# Supplementary material
Source: HighWire-hosted journal article supplement (https://bmjopengastro.bmj.com/highwire/filestream/2150/field_highwire_adjunct_files/0/bmjgast-2021-000631supp001_data_supplement.pdf)
Supplement: bmjgast-2021-000631supp001_data_supplement.pdf [file bmjgast-2021-000631supp001_data_supplement.pdf]

Table 1. Home and lab calprotectin results and classification

| Subject ID | IBDoc Value (µg/g) | value classification | IBDoc result date | Lab value (µg/g) | value classification 2 | Date lab result reported |
|------------|--------------------|----------------------|-------------------|------------------|------------------------|--------------------------|
| 0001       | 191                | Normal               | 27/04/2020        | 197              | Normal                 | 29/04/2020               |
| 0002       |                    |                      |                   |                  |                        |                          |
| 0003       | 816                | High                 | 05/05/2020        |                  |                        |                          |
| 0003       | 199                | Normal               | 12/07/2020        |                  |                        |                          |
| 0004       | >1000              | High                 | 19/05/2020        |                  |                        |                          |
| 0005       | >1000              | High                 | 12/05/2020        | 770              | High                   | 26/05/2020               |
| 0006       | >1000              | High                 | 10/05/2020        |                  |                        |                          |
| 0007       |                    |                      |                   | 38               | Normal                 | 28/04/2020               |
| 0008       | 924                | High                 | 06/05/2020        |                  |                        |                          |
| 0009       | invalid            | invalid              | 15/05/2020        |                  |                        |                          |
| 0009       | 502                | High                 | 08/06/2020        |                  |                        |                          |
| 0010       | >1000              | High                 | 12/05/2020        |                  |                        |                          |
| 0011       | 643                | High                 | 16/05/2020        | 1617             | High                   | 23/04/2020               |
| 0011       | >1000              | High                 | 08/07/2020        |                  |                        |                          |
| 0012       | <30                | Normal               | 10/06/2020        | <30              | Normal                 | 23/07/2020               |
| 0013       |                    |                      |                   | >1800            | High                   | 30/05/2020               |
| 0014       | 696                | High                 | 19/05/2020        | >1800            | High                   | 30/05/2020               |
| 0014       | 692                | High                 | 02/08/2020        |                  |                        |                          |
| 0015       | 237                | Normal               | 06/07/2020        |                  |                        |                          |
| 0016       | 210                | Normal               | 20/05/2020        |                  |                        |                          |
| 0017       | 890                | High                 | 22/07/2020        | 1223             | High                   | 01/07/2020               |
| 0018       | <30                | Normal               | 24/05/2020        |                  |                        |                          |
| 0019       | 118                | Normal               | 22/05/2020        |                  |                        |                          |
| 0020       |                    |                      |                   | 701              | High                   | 30/05/2020               |
| 0021       | 558                | High                 | 11/07/2020        |                  |                        |                          |
| 0022       | >1000              | High                 | 23/06/2020        | >1800            | High                   | 11/03/2020               |
| 0023       | 466                | Moderate             | 06/06/2020        |                  |                        |                          |
| 0024       | 228                | Normal               | 31/05/2020        |                  |                        |                          |
| 0025       |                    |                      |                   | >1800            | High                   | 04/06/2020               |
| 0026       | 765                | High                 | 29/05/2020        | >1800            | High                   | 29/05/2020               |
| 0027       | 421                | Moderate             | 06/08/2020        |                  |                        |                          |
| 0028       |                    |                      |                   | 167              |                        | 09/07/2020               |
| 0029       | >1000              | High                 | 07/06/2020        |                  |                        |                          |
| 0030       | <30                | Normal               | 09/06/2020        |                  |                        |                          |
| 0031       | 905                | High                 | 07/06/2020        | 77               | Normal                 | 28/07/2020               |
| 0032       |                    |                      |                   | 320              |                        | 19/06/2020               |
| 0033       | 536                | High                 | 14/06/2020        | 297              | Moderate               | 15/06/2020               |
| 0034       | 79                 | Normal               | 05/06/2020        |                  |                        |                          |
| 0035       | >1000              | High                 | 25/06/2020        |                  |                        |                          |

|      |       |          |            |       |          |            |
|------|-------|----------|------------|-------|----------|------------|
| 0036 | 316   | Moderate | 24/06/2020 |       |          |            |
| 0037 |       |          |            | 164   |          | 03/07/2020 |
| 0038 | 498   | Moderate | 01/07/2020 | <30   | Normal   | 14/07/2020 |
| 0039 |       |          |            | 85    |          | 03/07/2020 |
| 0040 | >1000 | High     | 05/07/2020 | >1800 | High     | 05/08/2020 |
| 0041 | 516   | High     | 26/06/2020 |       |          |            |
| 0042 |       |          |            |       |          |            |
| 0043 | 131   | Normal   | 02/07/2020 |       |          |            |
| 0044 | 49    | Normal   |            |       |          |            |
| 0045 |       |          |            |       |          |            |
| 0046 | 328   | Moderate | 22/07/2020 | 114   | Normal   | 23/04/2020 |
| 0047 | 709   | High     | 01/08/2020 | 350   | Moderate | 13/08/2020 |
| 0048 |       |          |            |       |          |            |
| 0049 | 112   | Normal   | 04/08/2020 |       |          |            |
| 0050 | 198   | Normal   | 16/07/2020 |       |          |            |
| 0051 | 194   | Normal   | 19/07/2020 |       |          |            |
| 0052 | 176   | Normal   | 24/07/2020 |       |          |            |
| 0053 | >1000 | High     | 30/07/2020 |       |          |            |
| 0054 |       |          |            |       |          |            |

Table 2. Action taken following home calprotectin

| Reason for home Test         | IBDoc Value (µg/g) | Lab value | Action taken                         |
|------------------------------|--------------------|-----------|--------------------------------------|
| Flaring                      | n/a                | 701       |                                      |
| Flaring                      | n/a                | 38        |                                      |
| Flaring                      | <30                | <30       | lab calprotectin requested           |
| Flaring                      | n/a                | >1800     |                                      |
| Flaring                      | 696                | >1800     | lab calprotectin requested           |
| (repeat calpro)              | 692                |           |                                      |
| Flaring                      | 210                |           | physical clinical review arranged    |
| Flaring                      | 466                |           | switch to infliximab from adalimumab |
| Flaring                      | n/a                | >1800     |                                      |
| Flaring                      | 536                | 297       | lab calprotectin requested           |
| Flaring                      | >1000              |           | To start CD treat                    |
| Surveillance (Uste)          | >1000              |           | uste dose increased                  |
| Surveillance (prev anti TNF) | >1000              | 770       | infliximab restarted                 |
| Surveillance (off therapy)   | >1000              |           | amgevita started                     |
| Surveillance (off MTX)       | 924                |           | amgevita started                     |
| Surveillance (Uste)          | >1000              |           | MP dose increased                    |
| Surveillance (ADA/MTX)       | 237                |           | MDT +conitnue current mgt            |

|                                         |         |       |                                               |
|-----------------------------------------|---------|-------|-----------------------------------------------|
| Surveillance (Aza)                      | 118     |       | MDT +continue current mgt                     |
| Surveillance (off IFX)                  | 228     |       | continue current mgt                          |
| Surveillance                            | 421     |       | lab calprotectin requested                    |
| Surveillance (Aza)                      | >1000   |       | phone clinic to discuss medication compliance |
| Surveillance (Aza)                      | <30     |       | continue current mgt                          |
| Surveillance (post CD-Azcro)            |         | 320   |                                               |
| Surveillance                            |         | 85    |                                               |
| Surveillance (off pred on MP)           | 516     |       | rectal salofalk dose increased                |
| Surveillance                            |         |       |                                               |
| Surveillance (reduced frequency of Ada) | 131     |       | adalimamub level requested                    |
| Surveillance                            |         |       |                                               |
| Surveillance                            | 709     | 350   | MRI + lab calpro requested                    |
| Surveillance                            | 198     |       | continue curent mgt                           |
| Surveillance                            | 176     |       | continue curent mgt                           |
| Surveillance                            | >1000   |       | lab calprotectin and endoscopy requested      |
| Surveillance                            |         |       |                                               |
| Response to therapy                     |         |       |                                               |
| Response to therapy                     | 816     |       | continue current management                   |
| (repeat calpro)                         | 199     |       |                                               |
| Response to therapy                     | invalid |       |                                               |
| (repeat calpro)                         | 502     |       | started on EEN                                |
| Response to therapy (EEN)               | 890     | 1223  | Mecaptopurine dose adjusted                   |
| Response to therapy (IFX)               | <30     |       | continue current therapy = MDT                |
| Response to therapy (EEN)               | 558     |       | continue current therapy                      |
| Response to therapy (biologic)          | >1000   | >1800 | adalimamub level requested                    |
| Response to therapy (EEN)               | 765     | >1800 | steroid started                               |
| Response to therapy (biologic)          |         | 167   |                                               |
| Response to therapy (biologic)          | 905     | 77    | Inflix frequency increased 4/wkly from 8wkly  |
| Response to therapy (biologic)          | 79      |       | to continue current management                |
| Response to therapy                     | 316     |       | continue current mgt/MDT discussion           |
| Response to therapy (EEN)               |         | 164   |                                               |
| Response to therapy (EEN)               | 498     | <30   | lab confirmation requested                    |
| Response to therapy (steroids)          | >1000   | >1800 | endoscopy requested                           |
| Response to therapy (biologic)          | 49      |       | continue current mgt                          |
| Response to therapy (modulen)           | 328     | 114   | continue current mgt                          |
| Response to therapy (biologic)          |         |       |                                               |
| Response to therapy (Biologic)          | 112     |       | continue current mgt                          |
| Response to therapy (Biologic)          | 194     |       | additional lab tests requested (nutritional)  |
| New diagnosis                           | 191     | 197   | salofalk dose reduced                         |
| New diagnosis                           | 643     | 1617  | continue mgt (modulen)                        |

**Basic report**  
**IBDoc User Feedback**

Total number of respondents: 20

**1. Did you find the user instructions easy to understand?**

Number of respondents: 20

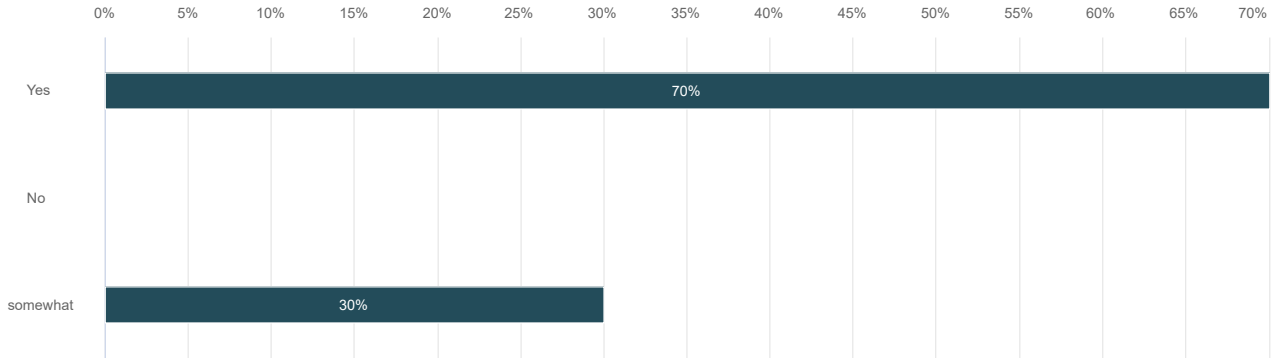

|          | n  | Percent |
|----------|----|---------|
| Yes      | 14 | 70%     |
| No       | 0  | 0%      |
| somewhat | 6  | 30%     |

**2. Did you find the IBDoc kit easy to use?**

Number of respondents: 20

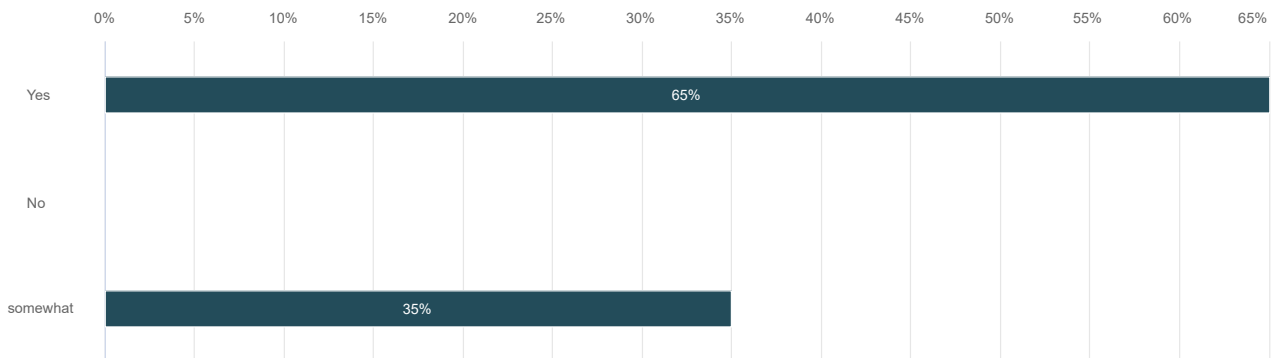

|          | n  | Percent |
|----------|----|---------|
| Yes      | 13 | 65%     |
| No       | 0  | 0%      |
| somewhat | 7  | 35%     |

**3. Is there anything you would add to the kit to make it easier to use?**

Number of respondents: 20

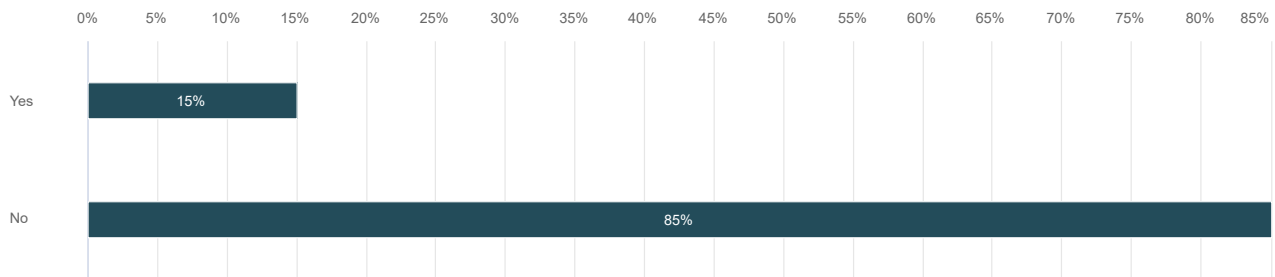

|     | n  | Percent |
|-----|----|---------|
| Yes | 3  | 15%     |
| No  | 17 | 85%     |

**Answers given into free text field**

| Option names | Text                                                                                                                                                                 |
|--------------|----------------------------------------------------------------------------------------------------------------------------------------------------------------------|
| Yes          | The catching paper for the stools is a bit weak when collecting a solid stool ,ours just collapsed, I would try make something more substantial to collect the stool |
| Yes          | Anotate kit that you dont get the results yourself if the IBD Team set it up so that the results only go to them.                                                    |
| Yes          | The instructions where just pictures, the video the nurse sent made more sense and made it easier to use                                                             |

**4. Would you comfortable/willing to use the IBDoc home test kit in future?**

Number of respondents: 20

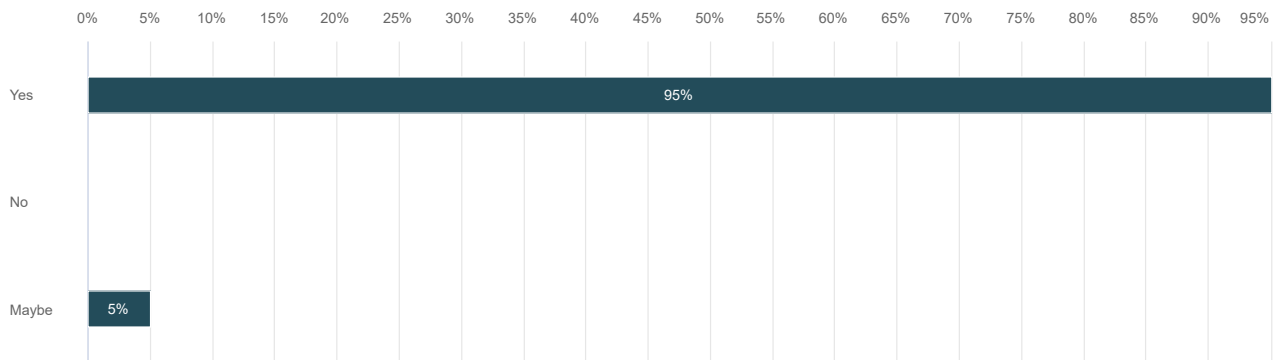

|       | n  | Percent |
|-------|----|---------|
| Yes   | 19 | 95%     |
| No    | 0  | 0%      |
| Maybe | 1  | 5%      |

**Answers given into free text field**

| Option names | Text |
|--------------|------|
|--------------|------|

**5. Do you have any suggestions on changes that could make the IBDoc easier to use?**

Number of respondents: 19

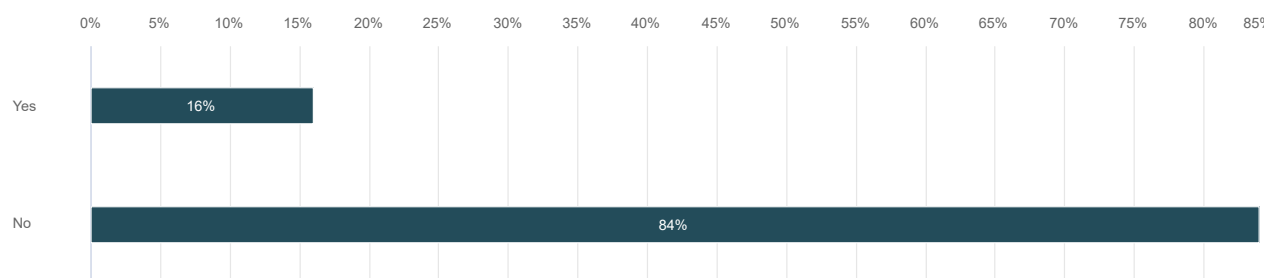

|     | n  | Percent |
|-----|----|---------|
| Yes | 3  | 15.79%  |
| No  | 16 | 84.21%  |

**Answers given into free text field**

| Option names | Text                                                                                                                                                     |
|--------------|----------------------------------------------------------------------------------------------------------------------------------------------------------|
| Yes          | longer time given to algin and take pic of result. Time ran out when trying to do                                                                        |
| Yes          | we should have watched the video first                                                                                                                   |
| Yes          | A trouble shooting guide- the results didn't automatically send as they should have , a guide would have given guidance on what to do in this situation. |

**6. Do you prefer the home sample kit or the hospital sample method?**

Number of respondents: 20

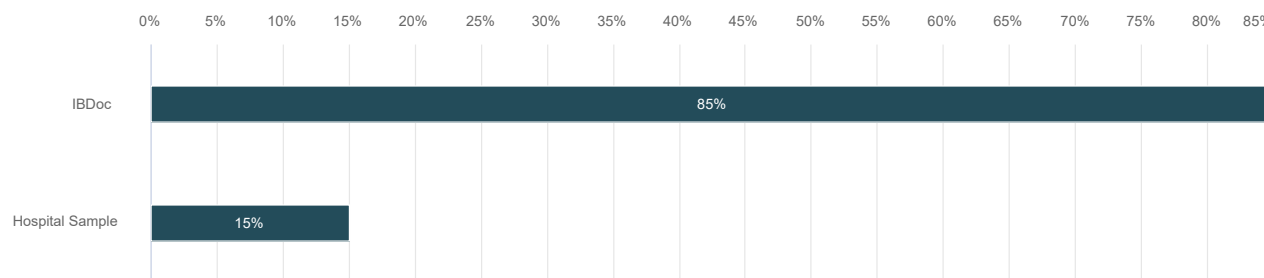

|                 | n  | Percent |
|-----------------|----|---------|
| IBDoc           | 17 | 85%     |
| Hospital Sample | 3  | 15%     |

**7. Can you tell us why you made the choice in question 6 ?**

Number of respondents: 18

| Responses                                                                                                                                                                                                                                                                                                                                                                              |
|----------------------------------------------------------------------------------------------------------------------------------------------------------------------------------------------------------------------------------------------------------------------------------------------------------------------------------------------------------------------------------------|
| Preferred doing it all at home rather than having to drop the sample into the drs. Also the result was much quicker rather than having to wait a couple of weeks for the results.                                                                                                                                                                                                      |
| Quick and simple to use and faster results                                                                                                                                                                                                                                                                                                                                             |
| Quick and easy to use, and you get an immediate result.                                                                                                                                                                                                                                                                                                                                |
| Previously, doing the test would have meant me collecting a kit from the GP, doing the test then physically taking it up to the hospital. The home kit is much more convenient.                                                                                                                                                                                                        |
| Saves time for health professionals and the patient.                                                                                                                                                                                                                                                                                                                                   |
| It takes the pressure of our teenage son to produce a sample for a specific time! Also, going to the Hospital is not as straightforward as it used to be before CoVID 19. Therefore, it makes more sense to be able to do the Calprotectin test at home.                                                                                                                               |
| It was easy and I feel more comfortable                                                                                                                                                                                                                                                                                                                                                |
| Easy to use and didn't need to produce a sample on clinic day. Also didn't have to go to appointment with sample as can be a little embarrassing for child.                                                                                                                                                                                                                            |
| My son gets very anxious at hospital so this kit is perfect to keep him happy                                                                                                                                                                                                                                                                                                          |
| Easier at home                                                                                                                                                                                                                                                                                                                                                                         |
| It's a lot easier with home kit as I live 3 hour drive from the kids hospital and the sample has to be handed in at hospital here then onto Glasgow meaning the results take longer to come back. Great piece of kit                                                                                                                                                                   |
| its more convenient                                                                                                                                                                                                                                                                                                                                                                    |
| my daughter prefers it as it's less messy, she's in control and it's a more private experience                                                                                                                                                                                                                                                                                         |
| I liked the opportunity to use the testing kit at home, the long incubation time made me a little apprehensive to get the test started to ensure I could complete the test properly. However having done it I feel more confident to home test again in the future. I chose the hospital test over home test as the result was intermediate and we had to go for hospital test anyway. |
| As there's a decreased chance of it going wrong                                                                                                                                                                                                                                                                                                                                        |
| Saves having to go to clinic                                                                                                                                                                                                                                                                                                                                                           |
| It's much more practical for our family, traditional tests rely on being able to get the results to doctors surgery or hospital which isn't always easy. Using the home kit meant it could be done anytime of the day, any day of the week.                                                                                                                                            |
| Saves a trip to hand in sample.                                                                                                                                                                                                                                                                                                                                                        |

**8. please tell us what you thought about using the kit in your own words.**

Number of respondents: 18

| Responses                                                                                                                                                                                                                                                                                                                                                                                                                                            |
|------------------------------------------------------------------------------------------------------------------------------------------------------------------------------------------------------------------------------------------------------------------------------------------------------------------------------------------------------------------------------------------------------------------------------------------------------|
| I found it very interesting - as a family we had in a lot of samples so it felt much simpler to perform the test at home. Instructions were clear and easy to follow and although we don't see an exact figure for the calprotectin until the nurse gets back we still could see whether the result was high, medium or low, which is helpful. I assisted my son with the test but I would be confident that he could follow the steps if he had to. |
| Quick and simple to use, easy to understand and less hassle                                                                                                                                                                                                                                                                                                                                                                                          |
| No issues, Easy to use and quick result.                                                                                                                                                                                                                                                                                                                                                                                                             |
| I found the instructions confusing at first but eventually got the hang of it. I thought I had done something wrong when I didn't immediately get the result but found out later that was due to the way the IBD team set up the account. I would definitely prefer to do the test this way in future.                                                                                                                                               |
| It was easy to use                                                                                                                                                                                                                                                                                                                                                                                                                                   |
| The App needs to be more accessible to other Devices. Luckily we managed to find an old iPod Touch (5th Gen) or we wouldn't have been able to do the test. Now that we have done the test at home for the first time, the next time will be so much easier and less stressful.                                                                                                                                                                       |
| At first I didn't like the idea of it, however after completing it I felt it was a better and more comfortable process than first thought.                                                                                                                                                                                                                                                                                                           |
| It was easy to use and reassuring that the test could be done while the pandemic is present.                                                                                                                                                                                                                                                                                                                                                         |
| very simple good instruction with kit and online                                                                                                                                                                                                                                                                                                                                                                                                     |
| Was a little fiddly but happier doing at home                                                                                                                                                                                                                                                                                                                                                                                                        |
| Brilliant, efficient and a lot easier and less stress waiting on hospital tests.                                                                                                                                                                                                                                                                                                                                                                     |
| once we got the hang of it (you need to click it really hard), it's pretty straight forward and it's good to get a normal or high reading straight away                                                                                                                                                                                                                                                                                              |
| I thought it was good however my son's result was much higher than I expected which made me doubt myself if I had done it correct.                                                                                                                                                                                                                                                                                                                   |
| The video really helped to explain the process. The collection 'sheet' was helpful to collect the sample for the tube. The app was straightforward to use to set up the camera for reading the result. I think I would feel more confident with a more defined recommended incubation period, I was worried that choosing too long (8+ hours) or short (2 hours) a time would impact the result.                                                     |
| I thought that the instructions were easy to follow however found it a bit daunting in case I did the test wrong                                                                                                                                                                                                                                                                                                                                     |
| Useful                                                                                                                                                                                                                                                                                                                                                                                                                                               |
| It was easy to use and was a much more practical solution. Meant that it saved a visit to a surgery and results being with GI team much faster is a real bonus.                                                                                                                                                                                                                                                                                      |
| Overall easy to use was just a bit impatient waiting to test sample. Found difficult when app wouldn't download on iPad or new iPhone had to try various phones in the family to get app downloaded to test sample.                                                                                                                                                                                                                                  |
